# Supplementary material
Source: MDPI journal article supplement (https://www.mdpi.com/2304-6740/4/2/18)
Supplement: s1 [file s1]

# Supplementary Materials: Interactions of Tetrapropylammonium Cations in Silicalite Clear Precursor Sols Investigated by $^1\text{H}$ and $^{13}\text{C}$ NMR

Mohamed Haouas, David P. Petry, Michael W. Anderson and Francis Taulelle

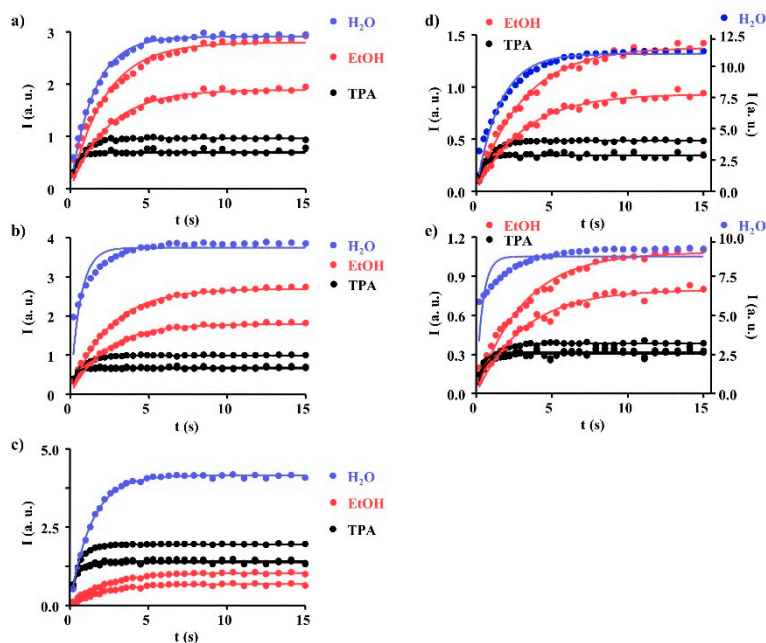

**Figure S1.** Relaxation delay dependence of  $^1\text{H}$  magnetization in  $T_1$  saturation-recovery experiment for the different signals obtained for TPA, ethanol and water in samples (a) S, (b) S0, (c) SH, (d) SD, and (e) SD0. The lines are from fitting the curves to  $I = I_\infty(1 - \exp(-t/T_1))$ .

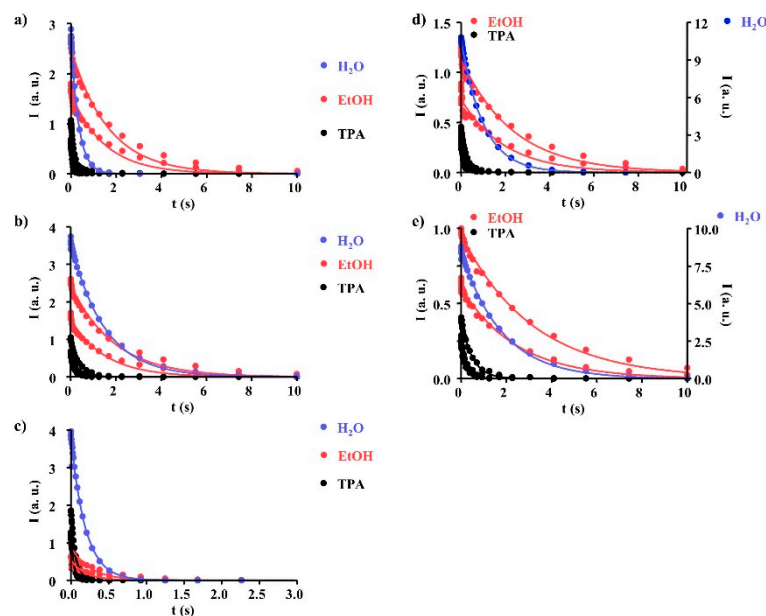

**Figure S2.** Relaxation delay dependence of  $^1\text{H}$  magnetization in  $T_2$  measurement experiment for the different signals obtained for TPA, ethanol and water in samples (a) S, (b) S0, (c) SH, (d) SD, and (e) SD0. The lines are from fitting the curves to  $I = I_\infty \exp(-t/T_2)$ .
